# Supplementary material for: A Novel TNM Classification for Colorectal Cancers based on the Metro-ticket Paradigm
Source: PubMed Central journal article supplement (PMC8100802; doi:10.7150/jca.55097), 2021-04-05
Supplement: jcav12p3299s1.pdf [file jcav12p3299s1.pdf]

**Table S1.** Five-year OS and 95% CI for AJCC 8th TNM classification and nTNM classification based on whether the retrieved lymph nodes were sufficient in training and validation cohorts.

| Variable            | No. of retrieved lymph nodes < 12 |           |         | No. of retrieved lymph nodes ≥ 12 |           |         |
|---------------------|-----------------------------------|-----------|---------|-----------------------------------|-----------|---------|
|                     | HR (95% CI)                       | 5-year OS | P value | HR (95% CI)                       | 5-year OS | P value |
| Training cohort     |                                   |           |         |                                   |           |         |
| TNM classification  |                                   |           | <0.001  |                                   |           | <0.001  |
| I                   | 1 (Reference)                     | 90.3%     |         | 1 (Reference)                     | 92.6%     |         |
| IIA                 | 1.95 (1.77–2.15)                  | 78.8%     |         | 1.68 (1.55–1.82)                  | 86.8%     |         |
| IIB                 | 2.98 (2.43–3.66)                  | 66.4%     |         | 2.92 (2.52–3.39)                  | 75.2%     |         |
| IIC                 | 3.82 (3.12–4.69)                  | 57.8%     |         | 3.69 (3.21–4.25)                  | 69.2%     |         |
| IIIA                | 1.34 (1.14–1.58)                  | 84.0%     |         | 1.41 (1.23–1.62)                  | 88.1%     |         |
| IIIB                | 3.17 (2.89–3.48)                  | 64.0%     |         | 2.92 (2.71–3.15)                  | 75.5%     |         |
| IIIC                | 6.70 (5.89–7.62)                  | 39.0%     |         | 7.00 (6.47–7.57)                  | 49.1%     |         |
| nTNM classification |                                   |           | <0.001  |                                   |           | <0.001  |
| I                   | 1 (Reference)                     | 92.4%     |         | 1 (Reference)                     | 93.8%     |         |
| IIA                 | 1.61 (1.40–1.85)                  | 87.2%     |         | 1.42 (1.24–1.62)                  | 91.1%     |         |
| IIB                 | 2.63 (2.33–2.96)                  | 76.7%     |         | 2.14 (1.91–2.40)                  | 85.9%     |         |
| IIC                 | 3.73 (3.27–4.27)                  | 66.5%     |         | 3.45 (3.05–3.89)                  | 75.9%     |         |
| IIIA                | 5.45 (4.77–6.27)                  | 53.7%     |         | 4.78 (4.23–5.39)                  | 67.7%     |         |
| IIIB                | 7.97 (6.71–9.46)                  | 40.0%     |         | 7.54 (6.68–8.50)                  | 53.5%     |         |
| IIIC                | 10.3 (8.10–13.1)                  | 35.2%     |         | 12.9 (11.3–14.8)                  | 34.6%     |         |
| Validation cohort   |                                   |           |         |                                   |           |         |
| TNM classification  |                                   |           | <0.001  |                                   |           | <0.001  |
| I                   | 1 (Reference)                     | 89.0%     |         | 1 (Reference)                     | 91.8%     |         |
| IIA                 | 2.04 (1.76–2.37)                  | 78.1%     |         | 1.52 (1.35–1.72)                  | 86.9%     |         |
| IIB                 | 3.38 (2.50–4.57)                  | 65.0%     |         | 3.14 (2.50–3.94)                  | 73.1%     |         |
| IIC                 | 6.24 (4.79–8.14)                  | 41.7%     |         | 3.71 (3.01–4.58)                  | 66.5%     |         |
| IIIA                | 1.63 (1.29–2.07)                  | 83.7%     |         | 1.35 (1.10–1.65)                  | 88.7%     |         |
| IIIB                | 3.35 (2.90–3.87)                  | 63.4%     |         | 2.71 (2.42–3.04)                  | 75.7%     |         |
| IIIC                | 6.93 (5.67–8.46)                  | 37.6%     |         | 6.32 (5.60–7.13)                  | 49.2%     |         |
| nTNM classification |                                   |           | <0.001  |                                   |           | <0.001  |
| I                   | 1 (Reference)                     | 90.8%     |         | 1 (Reference)                     | 92.2%     |         |
| IIA                 | 1.50 (1.21–1.85)                  | 86.3%     |         | 1.30 (1.07–1.58)                  | 91.3%     |         |
| IIB                 | 2.45 (2.05–2.94)                  | 77.2%     |         | 1.91 (1.61–2.25)                  | 85.7%     |         |
| IIC                 | 4.34 (3.56–5.29)                  | 61.5%     |         | 3.21 (2.69–3.84)                  | 76.1%     |         |
| IIIA                | 5.59 (4.55–6.87)                  | 51.4%     |         | 4.18 (3.51–4.99)                  | 67.8%     |         |
| IIIB                | 6.78 (5.17–8.90)                  | 45.1%     |         | 6.62 (5.54–7.91)                  | 52.8%     |         |
| IIIC                | 11.5 (8.21–16.2)                  | 27.0%     |         | 10.6 (8.59–13.0)                  | 37.4%     |         |

CI, confidence interval; HR, hazard ratio; OS, overall survival; No., number; nTNM, novel TNM; TNM, tumor-node-metastasis.

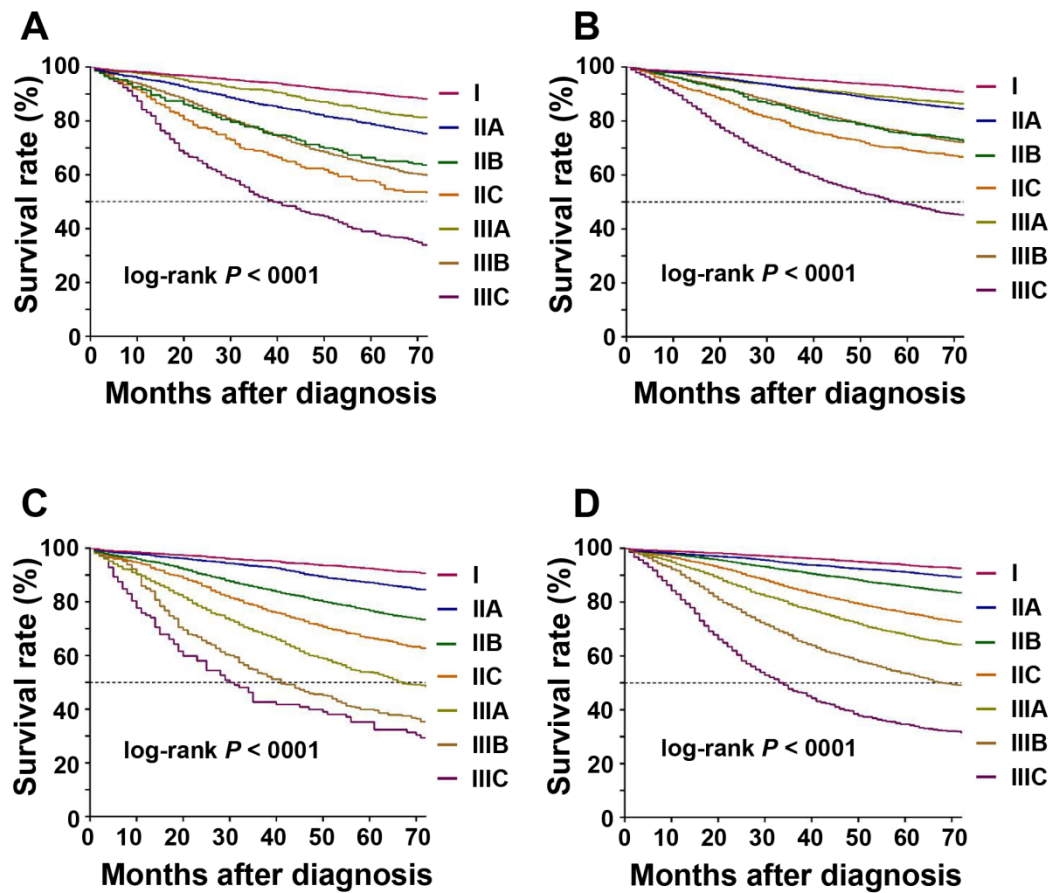

**Figure S1.** The Kaplan–Meier survival curve of the AJCC TNM and novel TNM (nTNM) staging systems based on whether the retrieved lymph nodes were sufficient in the training cohort. A: the AJCC TNM staging system in insufficient retrieved lymph nodes; B: the AJCC TNM staging system in sufficient retrieved lymph nodes; C: the nTNM staging system in insufficient retrieved lymph nodes; D: the nTNM staging system in sufficient retrieved lymph nodes.

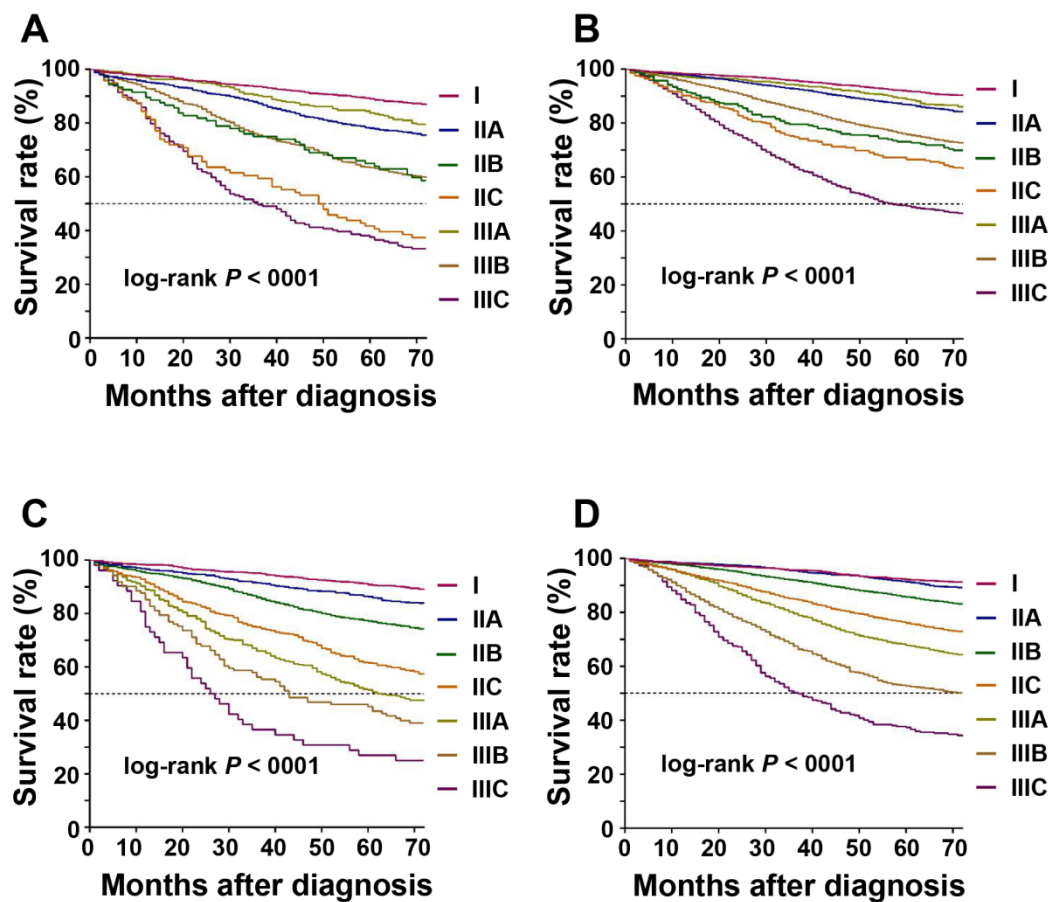

**Figure S2.** The Kaplan–Meier survival curve of the AJCC TNM and novel TNM (nTNM) staging systems based on whether the retrieved lymph nodes were sufficient in the validation cohort. A: the AJCC TNM staging system in insufficient retrieved lymph nodes; B: the AJCC TNM staging system in sufficient retrieved lymph nodes; C: the nTNM staging system in insufficient retrieved lymph nodes; D: the nTNM staging system in sufficient retrieved lymph nodes.
